# Supplementary material for: The lymphocyte/monocyte ratio predicts the efficacy of isatuximab plus pomalidomide in multiple myeloma patients
Source: PubMed Central journal article supplement (PMC11101389; doi:10.1007/s00262-024-03711-8), 2024-05-17
Supplement: 262_2024_3711_MOESM1_ESM.pdf [file 262_2024_3711_MOESM1_ESM.pdf]

# Supplemental Fig 1.

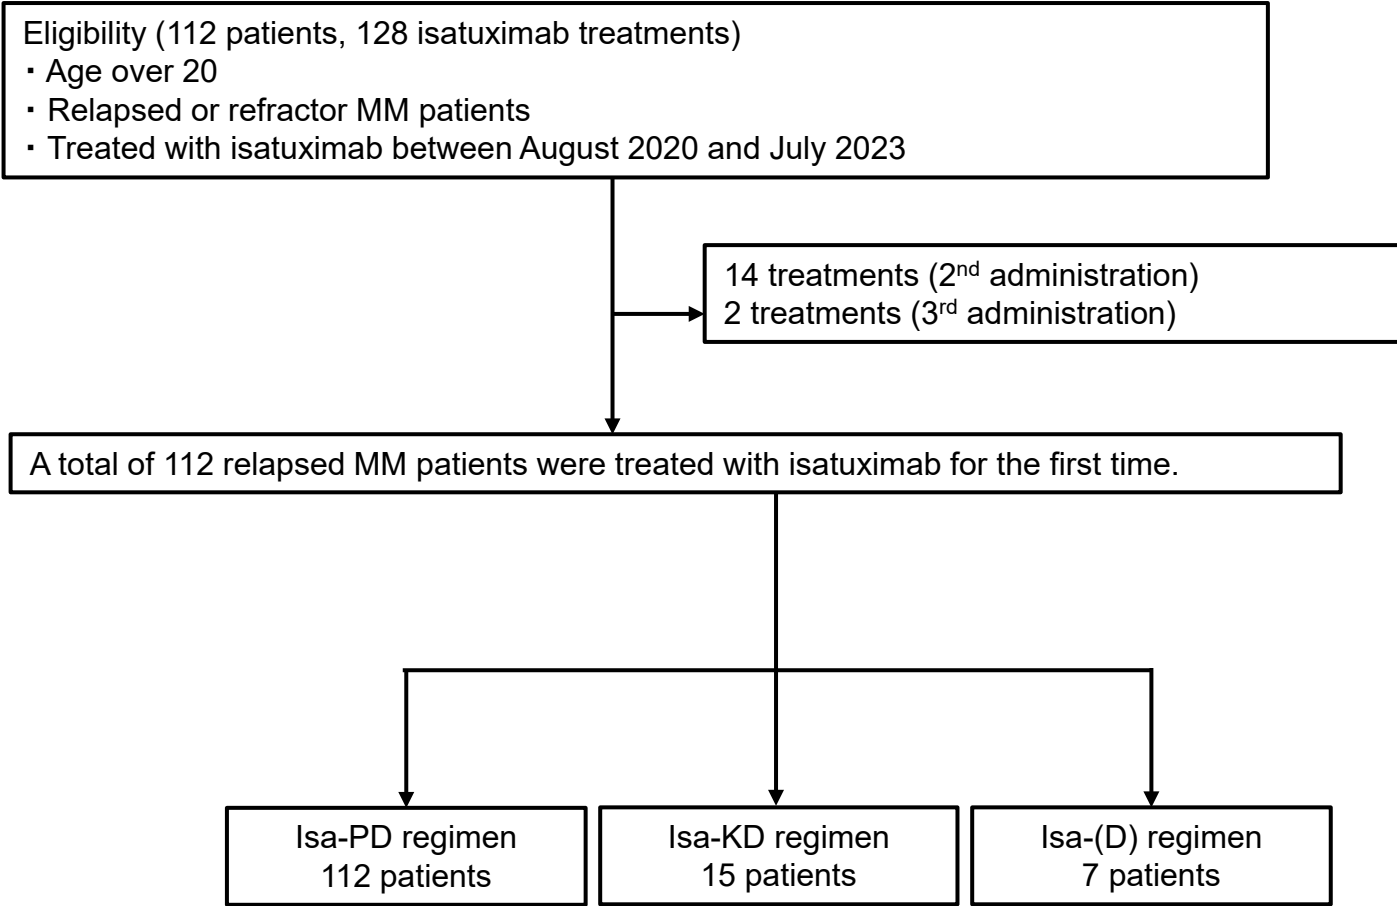

**Supplemental Fig 1.** Consort diagram of the study.

# Supplemental Fig 2.

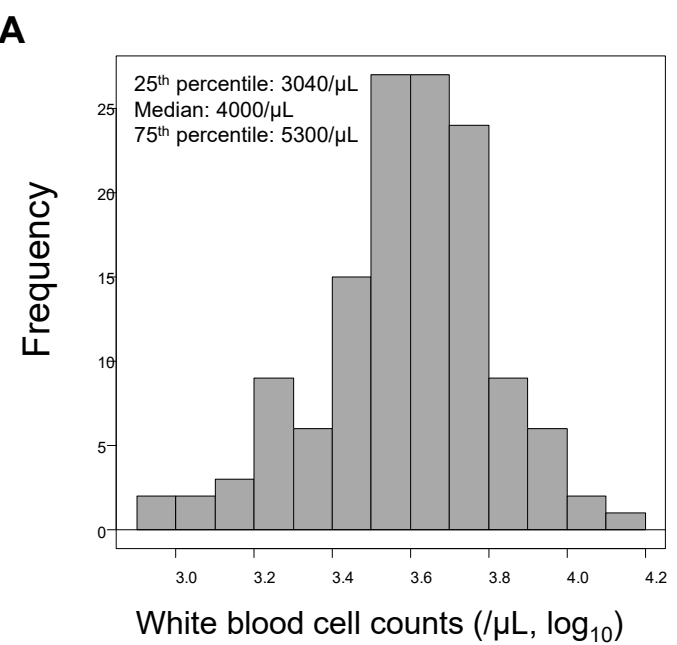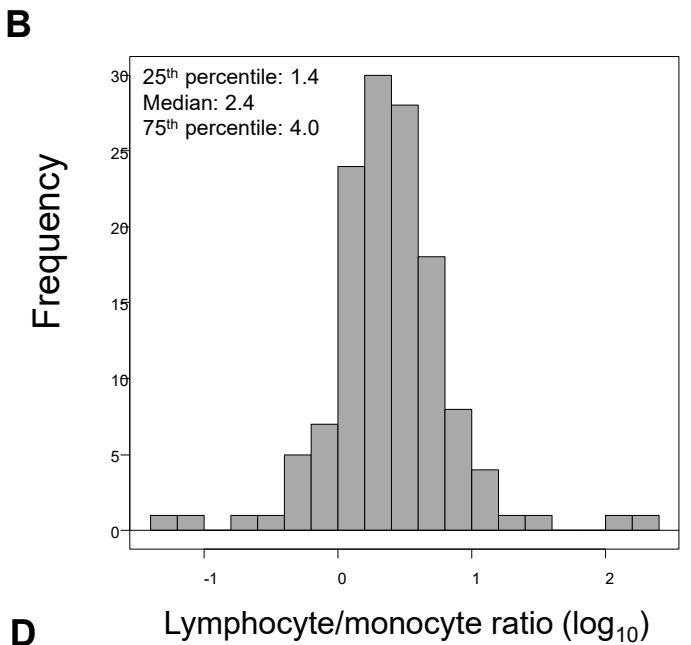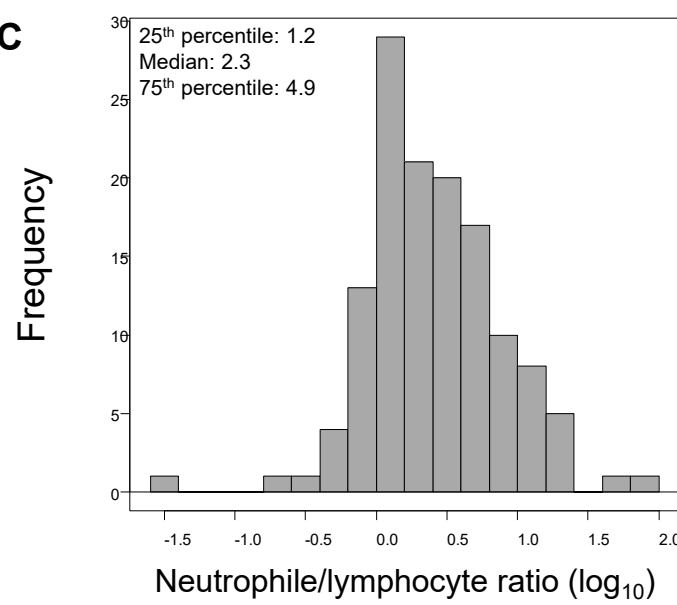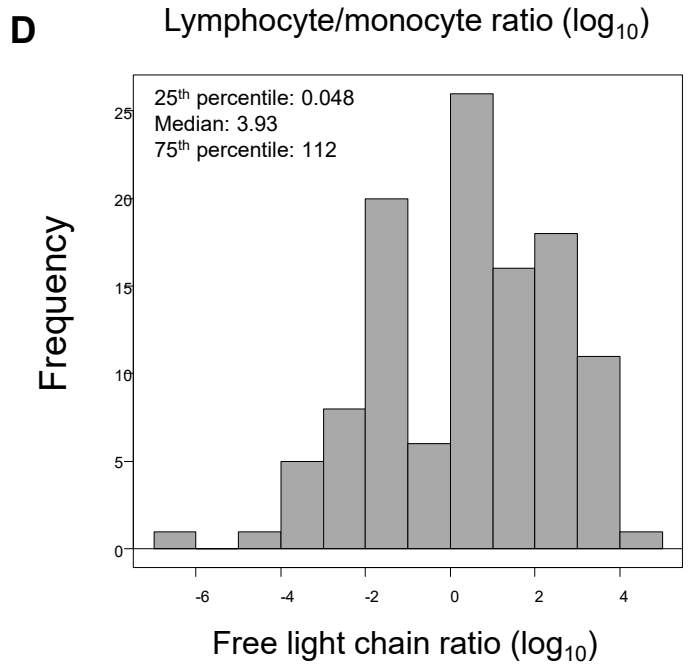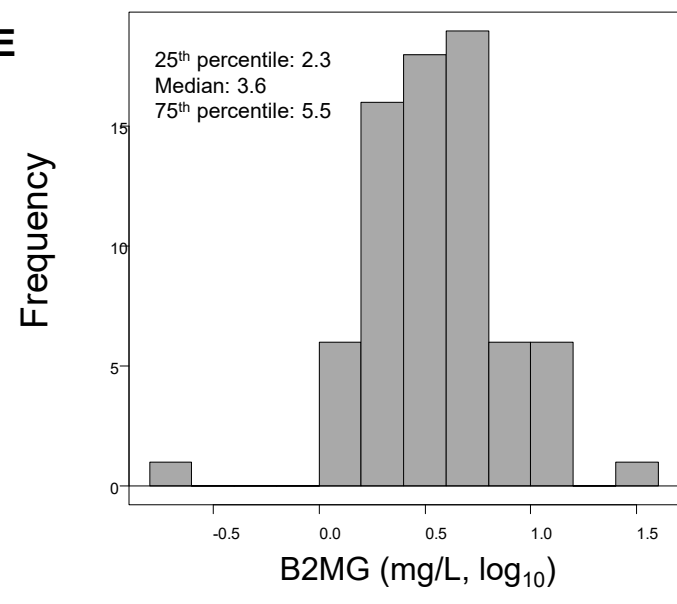

**Supplemental Fig 2. (A-F)** Histograms of the white blood cell counts **(A)**, lymphocyte/monocyte ratio **(B)**, neutrophil/lymphocyte ratio **(C)**, free light chain ratio **(D)**, and  $\beta_2$  microglobulin (B2MG) **(E)**. The horizontal axis is plotted in log scale. The 25<sup>th</sup> percentile, median, and 75<sup>th</sup> percentile values are described in the upper left panel of each figure.

# Supplemental Fig 3.

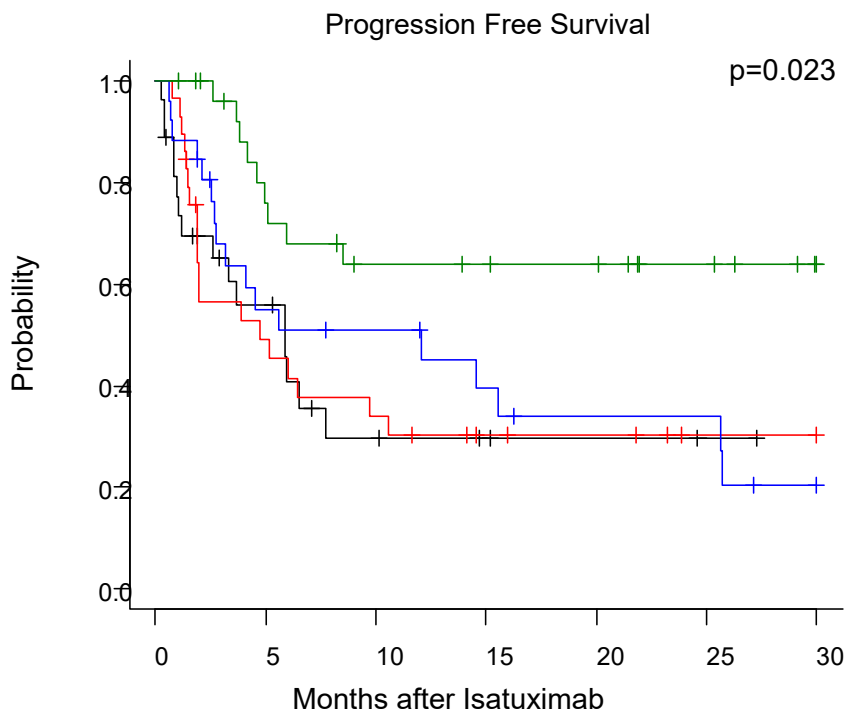

| LMR     | No. at risk | 12 | 18 | 24 | 30 | 36 | 42 |
|---------|-------------|----|----|----|----|----|----|
| <1.4    | 27          | 12 | 5  | 3  | 2  | 1  | 0  |
| 1.4-2.4 | 29          | 13 | 9  | 5  | 4  | 1  | 1  |
| 2.4-4.0 | 26          | 13 | 11 | 7  | 5  | 5  | 2  |
| ≥4.0    | 29          | 19 | 14 | 13 | 12 | 8  | 4  |

| LMR       | HR    | 95% CI      | P value   |
|-----------|-------|-------------|-----------|
| — <1.4    | 1     |             | (control) |
| — 1.4-2.4 | 0.959 | 0.492-1.868 | 0.902     |
| — 2.4-4.0 | 0.800 | 0.402-1.591 | 0.525     |
| — ≥4.0    | 0.307 | 0.135-0.699 | 0.005     |

**Supplemental Fig 3.** The progression-free survival (PFS) of the multiple myeloma (MM) patients under an isatuximab, pomalidomide, and dexamethasone (Isa-PD) regimen according to the lymphocyte/monocyte ratio (LMR): <1.4 (*black*), 1.4–2.4 (*red*), 2.4–4.0 (*blue*), and ≥4.0 (*green*). The hazard ratio (HR) with the 95% confidence interval (CI) and p-value are shown. The number of patients at risk in each group is shown in the lower panel of each figure.

# Supplemental Fig 4

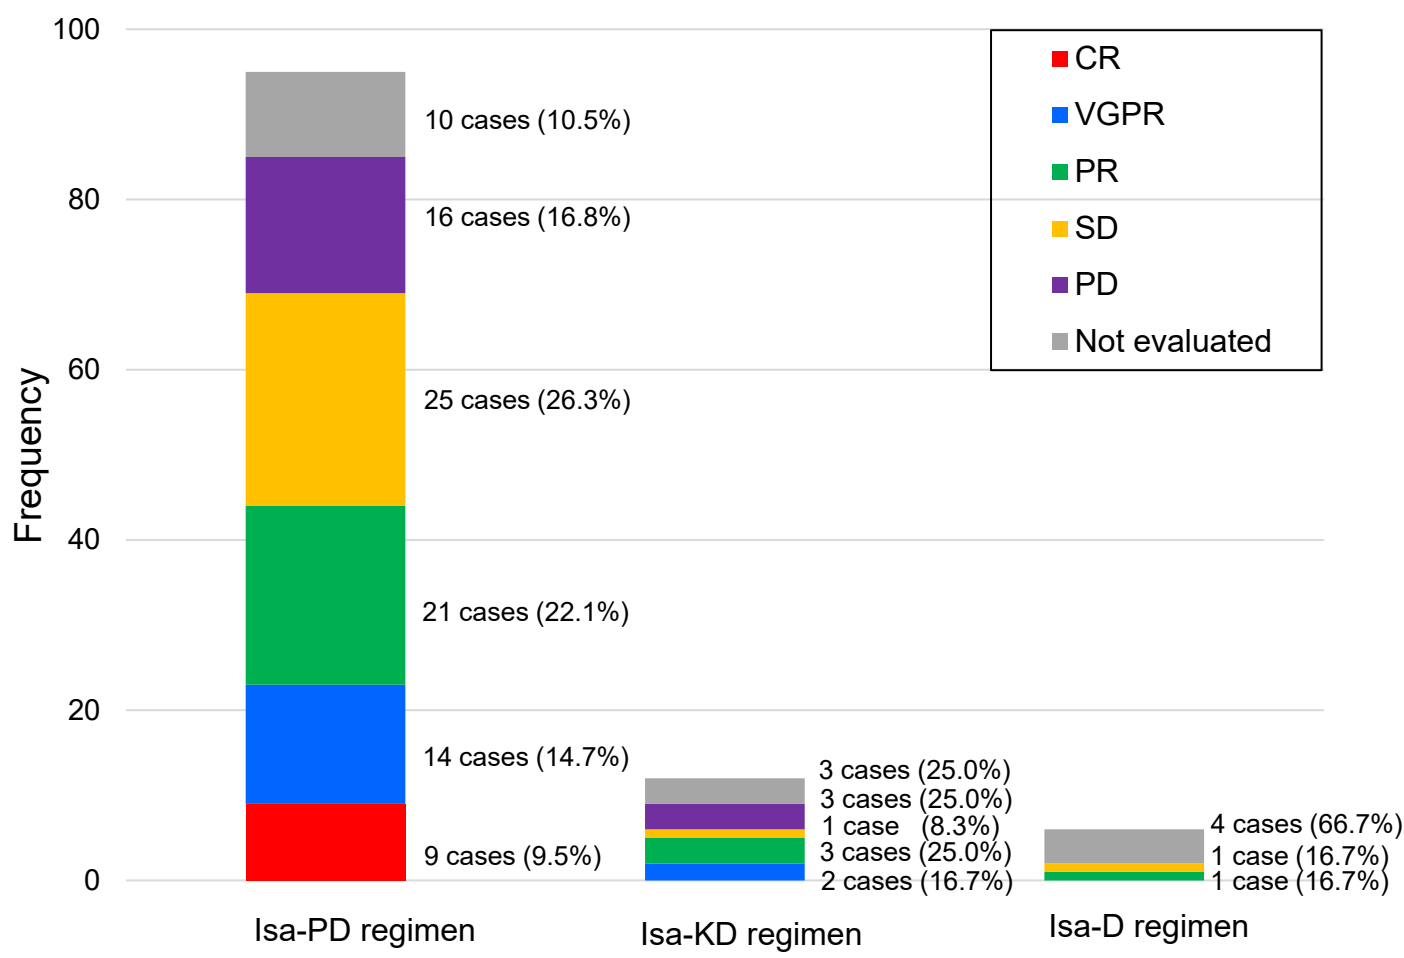

**Supplemental Fig 4.** The proportion of the best treatment response against isatuximab treatment. The number of cases (with %) of each regimen is shown. Patients with a CR, VGPR or PR were regarded as having a therapeutic response to isatuximab.

Abbreviations: CR, VGPR, PR, SD, PD, Isa-PD, Isa-KD and Isa-D. CR: complete remission; VGPR: very good partial response; PR: partial response; SD: stable disease; PD: progressive disease; Isa-PD: isatuximab, pomalidomide, and dexamethasone; Isa-KD: isatuximab, carfilzomib, and dexamethasone; Isa-D: isatuximab and dexamethasone.

# Supplemental Fig 5.

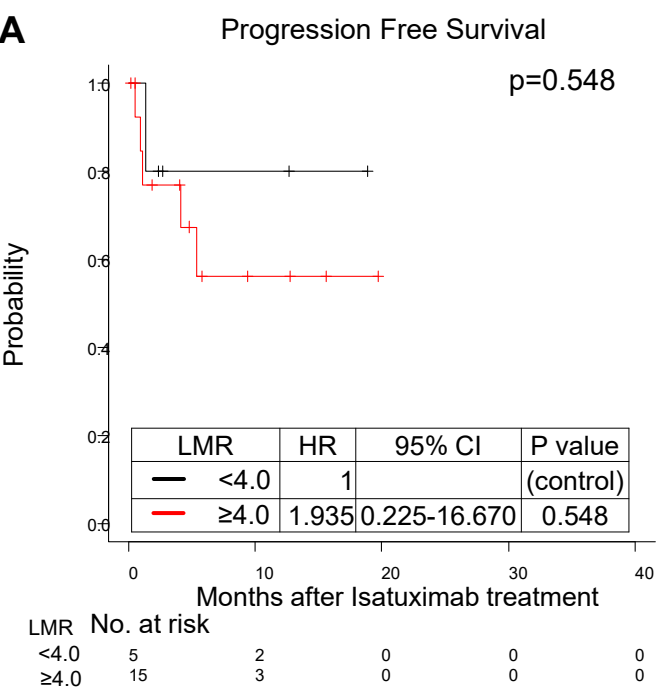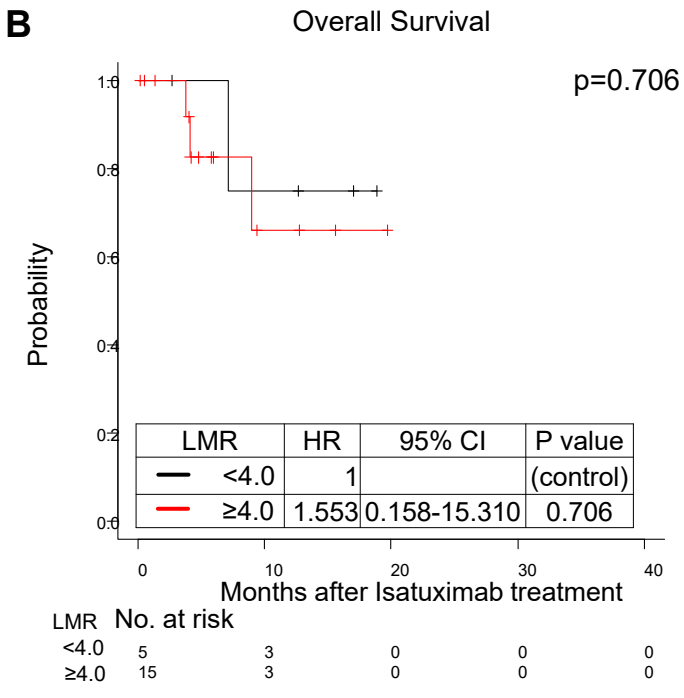

**Supplemental Fig 5(A-B).** The PFS (**A**) or OS (**B**) of the MM patients under an isatuximab, carfilzomib, and dexamethasone (Isa-KD) and an isatuximab and dexamethasone (Isa-D) regimen according to the lymphocyte/monocyte ratio (LMR): <4.0 (*black*) and ≥4.0 (*red*). The hazard ratio (HR) with the 95% confidence interval (CI) and p-value are shown. The number of patients at risk in each group is shown in the lower panel of each figure.

# Supplemental Fig 6.

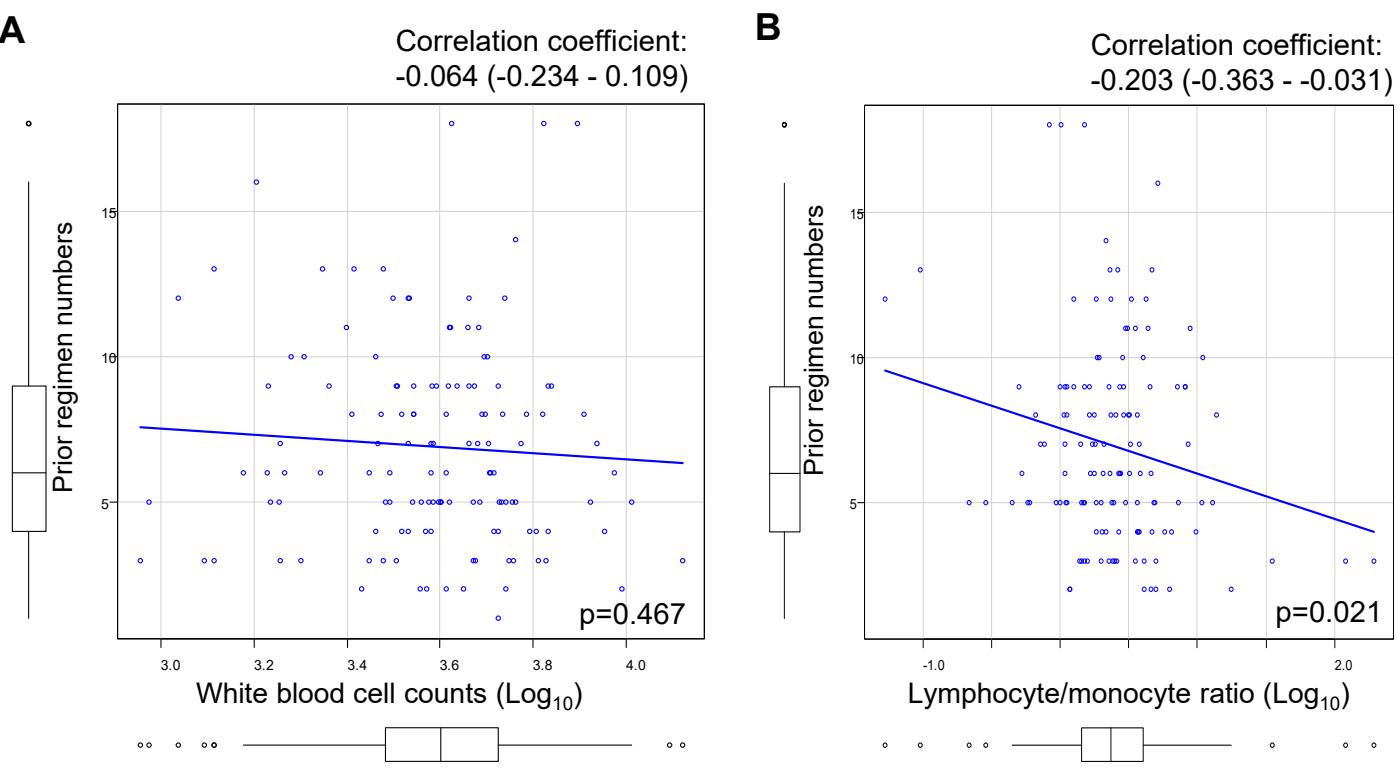

**Supplemental Fig 6(A-B).** The correlation between prior regimen numbers and white blood cell counts **(A)** or lymphocyte/monocyte ratio **(B)** was analyzed by Person's correlation coefficient.

1 Supplementary Table 1. Patient characteristics according to each regimen

| Type of treatment regimen              |                | Isa-PD     | Isa-KD     | Isa-D      | p-value |
|----------------------------------------|----------------|------------|------------|------------|---------|
| <b>Number of patients</b>              |                |            |            |            |         |
|                                        |                | 112        | 15         | 7          |         |
| <b>Age (years) at treatment</b>        |                |            |            |            |         |
|                                        | median (range) | 71 (42-89) | 71 (34-83) | 72 (50-81) | 0.916   |
| <b>Gender</b>                          |                |            |            |            |         |
|                                        | male           | 58 (51.8%) | 9 (60.0%)  | 5 (71.4%)  | 0.525   |
|                                        | female         | 54 (48.2%) | 6 (40.0%)  | 2 (28.6%)  |         |
| <b>Type of heavy chain</b>             |                |            |            |            |         |
|                                        | IgG            | 65 (58.6%) | 11 (73.3%) | 5 (71.4%)  | 0.702   |
|                                        | IgA            | 21 (18.9%) | 3 (20.0%)  | 1 (14.3%)  |         |
|                                        | BJP            | 20 (18.0%) | 0 (0.0%)   | 1 (14.3%)  |         |
|                                        | IgM            | 1 (0.9%)   | 0 (0.0%)   | 0 (0.0%)   |         |
|                                        | IgD            | 3 (2.7%)   | 0 (0.0%)   | 0 (0.0%)   |         |
|                                        | NA             | 1 (0.9%)   | 1 (6.7%)   | 0 (0.0%)   |         |
| <b>Type of light chain</b>             |                |            |            |            |         |
|                                        | λ              | 41 (36.6%) | 2 (13.3%)  | 0 (0.0%)   | 0.139   |
|                                        | κ              | 68 (60.7%) | 12 (80.0%) | 7 (100.0%) |         |
|                                        | NA             | 3 (2.7%)   | 1 (6.7%)   | 0 (0.0%)   |         |
| <b>ISS stage at diagnosis</b>          |                |            |            |            |         |
|                                        | I              | 35 (31.3%) | 3 (21.4%)  | 4 (57.1%)  | 0.121   |
|                                        | II             | 34 (30.4%) | 8 (57.1%)  | 0 (0.0%)   |         |
|                                        | III            | 34 (30.4%) | 3 (21.4%)  | 2 (28.6%)  |         |
|                                        | NA             | 9 (8.0%)   | 0 (0.0%)   | 1 (14.3%)  |         |
| <b>High-risk cytogenic abnormality</b> |                |            |            |            |         |
|                                        | none           | 47 (42.0%) | 8 (53.3%)  | 3 (42.9%)  | 0.354   |
|                                        | at least one   | 40 (35.7%) | 6 (40.0%)  | 1 (14.3%)  |         |
|                                        | NA             | 25 (22.3%) | 1 (6.7%)   | 3 (42.9%)  |         |



| Laboratory data before isatuximab treatment |                       |                   |                   |                  |       |
|---------------------------------------------|-----------------------|-------------------|-------------------|------------------|-------|
| White blood cell count                      | (/μL, median, range)  | 4045 (940-13230)  | 4300 (1300-10300) | 3400 (900-5300)  | 0.599 |
| Lymphocyte/monocyte ratio                   | (median, range)       | 2.36 (0.05-193.0) | 3.18 (0.29-35.0)  | 1.95 (1.42-17.5) | 0.852 |
| Neutrophil/lymphocyte ratio                 | (median, range)       | 2.37 (0.03-67.0)  | 1.88 (0.36-45.0)  | 2.10 (0.68-8.30) | 0.853 |
| Free light chain                            | (mg/L, median, range) |                   |                   |                  |       |
|                                             | κ                     | 2.3 (0.5-12040)   | 193 (0.5-3680)    | 692 (42-1606)    | 0.003 |
|                                             | λ                     | 9.7 (0.4-19665)   | 9.4 (0.5-69)      | 7.2 (0.7-19)     | 0.432 |
|                                             | κ/λ ratio             | 2.3 (0.001-14171) | 49.5 (0.01-4089)  | 85.9 (6.0-306)   | 0.063 |
| B2MG                                        | (mg/L, median, range) | 3.5 (1.3-31.8)    | 3.1 (1.5-12.0)    | 5.1 (0.2-6.3)    | 0.856 |
| Prior regimen numbers                       |                       |                   |                   |                  | 0.023 |
|                                             | median (range)        | 7 (2-18)          | 5 (3-18)          | 4 (2-7)          |       |
| Prior use of daratumumab                    |                       |                   |                   |                  | 0.027 |
|                                             | Yes                   | 69 (62.2%)        | 13 (86.7%)        | 2 (28.6%)        |       |
| Follow-up period of survivor                |                       |                   |                   |                  | 0.002 |
|                                             | median days (range)   | 612 (14-1137)     | 182 (7-600)       | 146 (10-518)     |       |

1 The characteristics of multiple myeloma patients according to the regimen are shown in Supplementary Table 1.

2 NA: not available; ISS: International Staging System; β<sub>2</sub> microglobulin: B2MG.

1 Supplementary Table 2. Univariate analysis for PFS under the Isa-KD and Isa-D regimens

|                                   |              | Isa-KD regimen |           |         | Isa-D regimen  |          |         |
|-----------------------------------|--------------|----------------|-----------|---------|----------------|----------|---------|
| Factors                           |              | 1-year-PFS (%) | 95% CI    | p-value | 1-year-PFS (%) | 95% CI   | p-value |
| Age                               | <65 years    | 60.0           | 12.6-88.2 | 0.604   | 66.7           | 5.4-94.5 | 0.922   |
|                                   | ≥65 years    | 62.2           | 21.3-86.4 |         | NA             | NA       |         |
| Gender                            | male         | 62.5           | 22.9-86.1 | 0.708   | 50.0           | 5.8-84.5 | 0.617   |
|                                   | female       | 62.5           | 14.2-89.3 |         | NA             | NA       |         |
| High-risk cytogenic abnormalities | none         | 46.9           | 12.0-76.3 | 0.448   | NA             | NA       | 0.117   |
|                                   | at least one | 80.0           | 20.4-96.9 |         | NA             | NA       |         |
|                                   | NA           | NA             | NA        |         | NA             | NA       |         |
| White blood cell counts           | <3000/μl     | 100.0          | NA        | 0.318   | NA             | NA       | 0.695   |
|                                   | ≥3000/μl     | 58.2           | 21.3-82.7 |         | 66.7           | 5.4-94.5 |         |
| Lymphocyte/monocyte ratio         | ≥4           | 75.0           | 12.8-96.1 | 0.756   | NA             | NA       | 0.617   |
|                                   | <4           | 62.2           | 21.3-86.4 |         | 50.0           | 5.8-84.5 |         |
| Neutrophil/lymphocyte ratio       | <2.3         | 44.4           | 6.6-78.5  | 0.177   | NA             | NA       | 0.117   |
|                                   | ≥2.3         | 85.7           | 33.4-97.9 |         | 100.0          | NA       |         |
| ISS Stage                         | I            | 100.0          | NA        | 0.113   | 66.7           | 5.4-94.5 | 0.515   |
|                                   | II           | 38.1           | 6.1-71.6  |         | NA             | NA       |         |
|                                   | III          | 100.0          | NA        |         | NA             | NA       |         |
| κ/λ ratio                         | 0.1-10       | 100.0          | NA        | 0.311   | NA             | NA       | 1.000   |
|                                   | ≤0.1, ≥10    | 56.2           | 14.7-84.2 |         | NA             | NA       |         |
| B2MG                              | <3.5mg/L     | 100.0          | NA        | 0.199   | 100.0          | NA       | 0.225   |
|                                   | ≥3.5mg/L     | 33.3           | 0.9-77.4  |         | NA             | NA       |         |

|                          |     |      |           |       |      |          |       |
|--------------------------|-----|------|-----------|-------|------|----------|-------|
| Prior regimen numbers    | <6  | 71.1 | 23.3-92.3 | 0.103 | 66.7 | 5.4-94.5 | 0.046 |
|                          | ≥6  | 40.0 | 5.2-75.3  |       | NA   | NA       |       |
| Prior use of daratumumab | no  | 50.0 | 0.6-91.0  | 0.795 | 37.5 | 1.1-80.8 | 0.388 |
|                          | yes | 62.5 | 26.8-84.6 |       | NA   | NA       |       |

- 1 Progression-free survival (PFS) was calculated from the time of isatuximab treatment to the progression of the disease. Univariate
- 2 analyses against PFS in MM patients treated with the Isa-KD and Isa-D regimens were performed for each factor. The log-rank test was
- 3 used for comparisons among groups. One-year PFS (%) is shown with the 95% confidence interval (CI) and p-value.
- 4 PFS: progression-free survival; CI: confidence interval; ISS: International Staging System; B2MG:  $\beta$ 2 microglobulin; NA: not available.

1 Supplementary Table 3. Univariate analysis for OS under the Isa-KD and Isa-D regimens

|                                   |              | Isa-KD regimen |           |         | Isa-D regimen |          |         |
|-----------------------------------|--------------|----------------|-----------|---------|---------------|----------|---------|
| Factors                           |              | 1-year-OS (%)  | 95% CI    | p-value | 1-year-OS (%) | 95% CI   | p-value |
| Age                               | <65 years    | 100.0          | NA        | 0.343   | 66.7          | 5.4-94.5 | 0.221   |
|                                   | ≥65 years    | 70.0           | 22.5-91.8 |         | NA            | NA       |         |
| Gender                            | male         | 80.0           | 20.4-96.9 | 0.750   | 37.5          | 1.1-80.8 | 0.388   |
|                                   | female       | 83.3           | 27.3-97.5 |         | 100.0         | NA       |         |
| High-risk cytogenic abnormalities | none         | 83.3           | 27.3-97.5 | 0.877   | 66.7          | 5.4-94.5 | 0.623   |
|                                   | at least one | 66.7           | 5.4-94.5  |         | NA            | NA       |         |
|                                   | NA           | NA             | NA        |         | NA            | NA       |         |
| White blood cell counts           | <3000/μl     | 100.0          | NA        | 0.516   | 50.0          | 0.6-91.0 | 0.695   |
|                                   | ≥3000/μl     | 71.1           | 23.3-92.3 |         | 50.0          | 0.6-91.0 |         |
| Lymphocyte/monocyte ratio         | ≥4           | 66.7           | 5.4-94.5  | 0.734   | NA            | NA       | 0.388   |
|                                   | <4           | 87.5           | 38.7-98.1 |         | 37.5          | 1.1-80.8 |         |
| Neutrophil/lymphocyte ratio       | <2.3         | 80.0           | 20.4-96.9 | 0.757   | 100.0         | NA       | 0.281   |
|                                   | ≥2.3         | 75.0           | 12.8-96.1 |         | 33.3          | 0.9-77.4 |         |
| ISS Stage                         | I            | 100.0          | NA        | 0.549   | 50.0          | 0.6-91.0 | 0.083   |
|                                   | II           | 80.0           | 20.4-96.9 |         | NA            | NA       |         |
|                                   | III          | 100.0          | NA        |         | NA            | NA       |         |
| κ/λ ratio                         | 0.1-10       | 100.0          | NA        | 0.593   | NA            | NA       | 1.000   |
|                                   | ≤0.1, ≥10    | 85.7           | 33.4-97.9 |         | 37.5          | 1.1-80.8 |         |
| B2MG                              | <3.5mg/L     | 100.0          | NA        | 0.414   | 100.0         | NA       | 0.225   |
|                                   | ≥3.5mg/L     | 66.7           | 5.4-94.5  |         | NA            | NA       |         |

|                          |     |      |           |       |      |           |       |
|--------------------------|-----|------|-----------|-------|------|-----------|-------|
| Prior regimen numbers    | <6  | 75.0 | 12.8-96.1 | 0.728 | 75.0 | 12.8-96.1 | 0.450 |
|                          | ≥6  | 75.0 | 12.8-96.1 |       | NA   | NA        |       |
| Prior use of daratumumab | no  | 50.0 | 0.6-91.0  | 0.350 | 50.0 | 5.8-84.5  | 0.617 |
|                          | yes | 90.0 | 47.3-98.5 |       | NA   | NA        |       |

- 1 Overall survival (OS) was calculated from the time of isatuximab treatment to the time of death by any cause. Univariate analyses
- 2 against PFS in MM patients treated with the Isa-KD and Isa-D regimens were performed for each factor. The log-rank test was used for
- 3 comparisons among groups. One-year-OS (%) is shown with the 95% confidence interval (CI) and p-value.
- 4 OS: overall survival; CI: confidence interval; ISS: International Staging System; B2MG:  $\beta$ 2 microglobulin; NA: not available.
